# Supplementary material
Source: PubMed Central journal article supplement (PMC4449274)
Supplement: NIHMS691321-supplement-supplement_1.pdf [file NIHMS691321-supplement-supplement_1.pdf]

**BMJ Quality  
& Safety**

## **Improving transition from paediatric to adult cystic fibrosis care: programme implementation and evaluation**

Megumi J Okumura, Thida Ong, Diana Dawson, Dennis Nielson, Nancy Lewis, Martha Richards, Claire D Brindis and Mary Ellen Kleinhenz

*BMJ Qual Saf* 2014 23: i64-i72 originally published online January 10, 2014

doi: 10.1136/bmjqs-2013-002364

---

Updated information and services can be found at:  
[http://qualitysafety.bmj.com/content/23/Suppl\\_1/i64](http://qualitysafety.bmj.com/content/23/Suppl_1/i64)

---

*These include:*

### **Supplementary Material**

Supplementary material can be found at:  
<http://qualitysafety.bmj.com/content/suppl/2014/01/10/bmjqs-2013-002364.DC1.html>

### **References**

This article cites 26 articles, 8 of which you can access for free at:  
[http://qualitysafety.bmj.com/content/23/Suppl\\_1/i64#BIBL](http://qualitysafety.bmj.com/content/23/Suppl_1/i64#BIBL)

### **Email alerting service**

Receive free email alerts when new articles cite this article. Sign up in the box at the top right corner of the online article.

---

### **Notes**

---

To request permissions go to:  
<http://group.bmj.com/group/rights-licensing/permissions>

To order reprints go to:  
<http://journals.bmj.com/cgi/reprintform>

To subscribe to BMJ go to:  
<http://group.bmj.com/subscribe/>
